# Supplementary material for: The Importance of Extraction Protocol on the Analysis of Novel Waste Sources of Lignocellulosic Biomass
Source: MDPI journal article supplement (doi:10.3390/en14196406), 2021-10-07
Supplement: s1 [file s1]

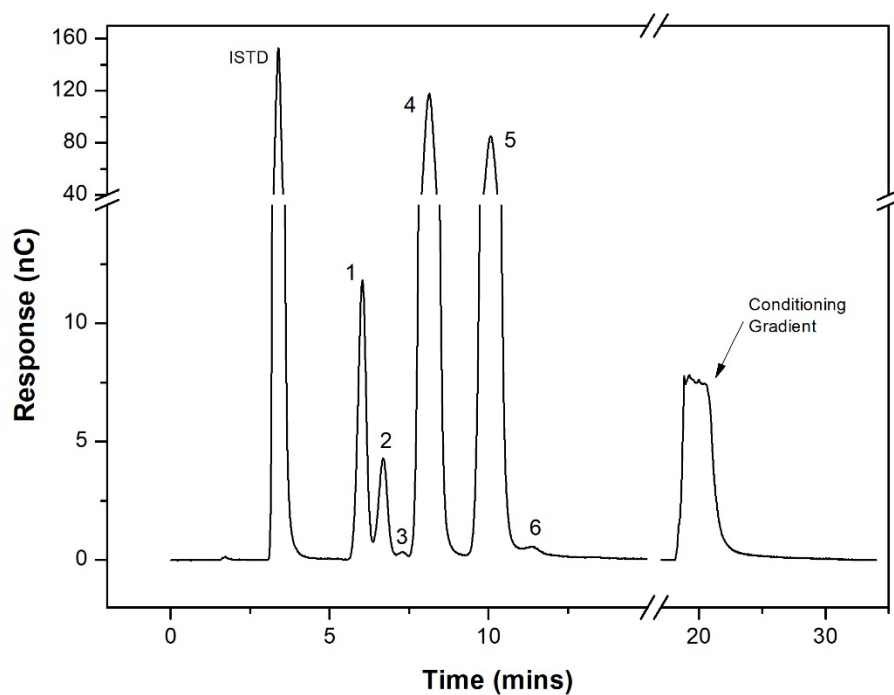

**Figure S1:** Example resulting from analysis. Peak assignments: ISTD = fucose, 1 = arabinose, 2 = galactose, 3 = rhamnose, 4 = glucose, 5 = xylose, and 6 = mannose
